# Supplementary material
Source: Royal Society of Chemistry journal article supplement (doi:10.1039/d6cp00469e)
Supplement: d6cp00469e1.pdf [file d6cp00469e1.pdf]

ARTICLE

1

2 **Local-friction governs water mobility in hydrogels acting as Extracellular mimics**

3 Monojit Das,<sup>a#</sup> Jayanta Mondal,<sup>b#</sup> Naglaa Atif Alhadi Rahma,<sup>b</sup> Gourab Ghosh,<sup>cd</sup> Nivedita Pan,<sup>b</sup> Lopamudra Roy,<sup>e</sup> Ria Ghosh,<sup>bf</sup>  
4 Susmita Mondal,<sup>b</sup> Muhammad Munir,<sup>g</sup> Anjan Kumar Das,<sup>h</sup> Niko Hildebrandt,<sup>g</sup> Ranjan Das,<sup>d\*</sup> Ranjit Biswas,<sup>b\*</sup> Samir Kumar  
5 Pal,<sup>bg\*</sup>

6

7 Received 00th January 20xx,

8 Accepted 00th January 20xx

9 DOI: 10.1039/x0xx00000x

10

11

12

13

---

<sup>a</sup> Department of Zoology, Vidyasagar University; Rangamati, Midnapore-721102, India

<sup>b</sup> Department of Chemical and Biological Sciences, S. N. Bose National Centre for Basic Sciences; Block JD, Sector 3, Salt Lake, Kolkata-700106, India

<sup>c</sup> Department of Chemistry, Vivekananda Mahavidyalaya, Haripal, Hooghly - 712405, India

<sup>d</sup> Department of Chemistry, West Bengal State University, Barasat, Kolkata, India

<sup>e</sup> Department of Applied Optics and Photonics, University of Calcutta; JD-2, Sector-III, Salt Lake, Kolkata, West Bengal, 700 106, India

<sup>f</sup> Department of Biochemistry, University of Calcutta, 35, Ballygunge Circular Road, Kolkata 700019, India

<sup>g</sup> Department of Engineering Physics, McMaster University, Hamilton, Ontario, L8S 4L7, Canada

<sup>h</sup> Department of Pathology, Nil Ratan Sircar Medical College and Hospital; Kolkata-700014, India

---

# Equal contributions

14

## 15 Spectroscopic Characterization of RK-1 Probe

16 A Shimadzu UV-2600 spectrophotometer was used to record all the absorption spectra. All the steady-state  
17 emission and excitation spectra were recorded using a Jobin Yvon Fluorolog fluorimeter.

## 18 Differential Scanning Calorimetry (DSC) Analysis

19 The complex frequency ( $\nu$ ) dependent relative permittivity,  $\varepsilon^*(\nu)$ , is expressed as follows, (Böttcher, C.  
20 J. F.; Belle, O. C. van; Bordewijk, P.; Rip, A. Theory of Electric Polarization, Volume 2. 1978, 561.  
21 10.1007/978-3-642-56120-7.)

$$22 \quad \varepsilon^*(\nu) = \varepsilon'(\nu) - \left[ i\varepsilon''(\nu) + \frac{ik}{2\pi\varepsilon_0\nu} \right] \quad (1)$$

23 Where  $\varepsilon_0$  is the permittivity of free space,  $k$  is the conductivity of the medium, and  $\varepsilon'$ ,  $\varepsilon''$   
24 imaginary components of the complex permittivity.

25 Our experimental approach integrated two distinct setups:

- 26 (i) A low-frequency impedance analyzer (E4991B) with an open-ended coaxial probe (Keysight  
27 85070E) and a high-temperature probe enabled measurements from 10 MHz to 500 MHz.  
28 Calibration was conducted with air, a shorting block, and water as open, short, and load  
29 standards, respectively.
- 30 (ii) A PNA-L network analyzer (N5235B) equipped with an open-ended coaxial probe kit (N1501A)  
31 to measure frequencies from 500 MHz to 50 GHz. Calibration for this setup also used air, a  
32 shorting block, and water as open, short, and load standards.

33 DR measurements were conducted in a laboratory with precise humidity control, maintained at  
34 approximately 30% relative humidity, and a stable ambient temperature of 298 K. Temperature stability  
35 was closely monitored using a thermometer positioned at the measurement site. Each measurement used a  
36 Chitosan hydrogel sample with a thickness of approximately 1 cm and a diameter of approximately 2 cm.  
37 These samples were designed to fully fill the measurement region and ensure stable mechanical properties.  
38 reducing edge effects and air-gap-induced scattering. The chosen thickness is suitable for broadband  
39 dielectric measurements and does not cause significant boundary or scattering issues or artifacts. Our

40 dimensions fall well within these guidelines. Special care was taken to ensure no air bubbles formed at the  
41 interface between the gel and the probe during measurement.

42 The dielectric response of the Chitosan hydrogel was analyzed by fitting the complex permittivity,  $\varepsilon^*(\nu)$ ,  
43 to a sum of Havriliak-Negami (HN) relaxation functions<sup>1</sup>. The expression for the complex permittivity is:

$$\varepsilon^*(\omega) = \varepsilon_\infty + \sum_{j=1}^n \frac{\Delta\varepsilon_j}{[1 + (i2\pi\nu\tau_j)^{1-\alpha_j}]^{\beta_j}} - \frac{ik}{2\pi\varepsilon_0\nu} \quad (2)$$

44  
45 where  $0 \leq \alpha < 1$  and  $0 < \beta \leq 1$ .  $\Delta\varepsilon_j$  denotes the amplitudes of the dispersion of j-th relaxation with time  
46  $\tau_j$ . Note that  $\alpha_j = 0$  and  $\beta_j = 1$  represents the relaxation via the Debye model, whereas  $\alpha_j = 0$  with  $\beta_j < 1$   
47 describes the Cole-Davidson (CD), and  $\alpha_j < 1$   $\beta_j = 1$  The Cole-Cole processes. Data collected from the  
48 dielectric measurements were simultaneously fitted using a multi-Debye relaxation model.

49 Fitting quality was estimated by checking the “goodness-of-fit” parameter ( $\chi^2$ ) determined using the  
50 following relation (Bevington; R., P. Data Reduction and Error Analysis for the Physical Sciences.  
51 *area*1969.),

$$\chi^2 = \frac{1}{2m-l} \sum_{i=1}^m \left[ \left( \frac{\delta\varepsilon_i'}{\sigma(\varepsilon_i')} \right)^2 + \left( \frac{\delta\varepsilon_i''}{\sigma(\varepsilon_i'')} \right)^2 \right] \quad (3)$$

52  
53 Where  $m$  is the number of data points ( $\nu, \varepsilon', \varepsilon''$ ),  $l$  is the number of adjustable parameters,  $\delta\varepsilon_i$  represents the  
54 residual for each data point, and  $\sigma(\varepsilon_i)$  denotes the standard deviation. Lower values  $\chi^2$  of indicate a closer  
55 match between the fitted model and the experimental data, validating the applicability of the multi-Debye  
56 model to describe the relaxation behavior of the Chitosan hydrogel.

### 57 Femtosecond Resolved Fluorescence Measurements Using Streak Camera and Data Analysis:

58 Femtosecond-resolved fluorescence decay experiments were performed in a custom-made streak camera-  
59 based setup. A 3.5 ps FWHM, LASER source (Mai Tai HP 1040S from Spectra Physics, Mode-Locked  
60 Ti: sapphire Laser, 2.5 W, repetition rate 80 MHz) was used as a source for femtosecond pulses. The overall  
61 setup consists of a monochromator (SpectraPro HRS-300), a sample compartment, and a time profile is  
62 created using a streak sweep unit, along with a CCD camera from Optronics OPTOSCOPE SC-10, where  
63 the decay profile is recorded as an image, called a streak image. The second harmonic pulse of the original  
64 one (880 nm) was used as an excitation source when measuring the femtosecond time-resolved spectra.

65 The streak images consist of wavelength and time-resolved data recorded at a single frame. The x-axis of  
66 the image represents time resolution, ranging from 0 to 290 ps, whereas the y-axis spans 150 nm in  
67 wavelength. The decay profiles at narrow wavelength spans can be resolved by streaking out a window of  
68 specified width along the time axis (x-axis), and height along the wavelength axis (typically 1-5 nm).  
69 Similarly, the time-resolved emission spectra at a particular time span can be extracted by streaking a  
70 window of specified width along the wavelength axis (y-axis), and height along the time axis (typically 0-  
71 5ps).

72 a) Fitting of the decay profile:

73 The decay profiles constructed from streak images were exported and fitted using Micromath Scientist  
74 software. Typically a decay profile follows the equation below,

$$75 \quad I(t) = I_0 e^{-\frac{t}{\tau}}, \quad (4)$$

76 where,  $I(t)$  is the recorded intensity,  $I_0$  is the initial intensity, and  $\tau$  is the fluorescence lifetime. The above  
77 expression was modified for multiexponential fluorescence decays. To fit the multiple decay components,  
78 we follow iterative deconvolution, which employs a deconvolution technique based on a nonlinear least-  
79 squares process. Detailed fitting procedures are explained in “Principles of Fluorescence Spectroscopy” by  
80 Lakowicz<sup>2</sup>

81 **Fitting of the time-resolved emission spectrum:**

82 The “raw” time-dependent emission spectra are first converted from a wavelength representation to a  
83 frequency representation, where it is worth mentioning that the conversion between wavelength and

84 frequency representations is done by reweighting intensity values by the factor  $\frac{\Delta\lambda}{\Delta\nu} = \nu^2$ . The data points  
85 determining the time-dependent emission spectra rarely follow a symmetric Gaussian distribution; rather,  
86 it follows skewed distribution and are fit to a log-normal line shape function<sup>3</sup>.

87 **Pico-Second-Resolved Fluorescence Measurements Using TCSPC and Data Analysis:**

88 Picosecond time-resolved spectroscopic studies were conducted using a commercial time-correlated single-  
89 photon counting (TCSPC) setup from Edinburgh Instruments. A picosecond pulsed LASER of 510 nm  
90 wavelength was used as the excitation source in this study. The instrument response function was 80-100  
91 ps. The experimental setup and methodology were discussed in detail in our earlier publications<sup>4</sup>.

## 92 a) Construction of Picosecond Time-Resolved Emission Spectrum:

93 The primary raw data consist of emission decays recorded at a series of wavelengths (in our case,  
 94 at 5 nm intervals) spanning the steady-state emission spectrum from blue to red over a definite  
 95 interval (here, 5 min). As expected, the contour collected in this method would contain the time-  
 96 resolved emission spectrum. The result of our interest was extracted from the contour spectrum,  
 97 with data points from 0 to 7 ns and an interval of 0.05 ns. As mentioned in the previous section, the  
 98 obtained time-dependent emission spectrum (TRES) was first converted from the wavelength (nm)  
 99 domain to the frequency domain and fitted using a lognormal distribution.

100 b) The solvation correlation function ( $c(t)$ ):

101 The solvation relaxation is accompanied by the time-dependent shift in the probe's emission peak  
 102 with time.  $C(t)$  represents the plot between the emission maximum (i.e., the maximum of the value  
 103 obtained by fitting the emission spectrum by the lognormal function<sup>3</sup> and the corresponding time.

$$104 \quad C(t) = \frac{\nu(t) - \nu(\infty)}{\nu(0) - \nu(\infty)} \quad (5)$$

105 **Time-Resolved Fluorescence Anisotropy:**

106 For the anisotropy measurements  $r(t)$ , the parallel and perpendicular emissions were adjusted and aligned  
 107 to the excitation, respectively, with respect to the polarizer at the emission side.  $r(t)$ , calculated, was done  
 108 following the equation below:

$$109 \quad r(t) = \frac{I_{\parallel}(t) - G \cdot I_{\perp}(t)}{I_{\parallel} + 2 \cdot G \cdot I_{\perp}(t)} \quad (6)$$

110 where  $I_{\parallel}(t)$  and  $I_{\perp}(t)$  are fluorescence decays of the dye at perpendicular and parallel polarized angles,  
 111 respectively, corresponding to vertically polarized excitation light.  $G$  is an instrument grating factor, a  
 112 wavelength-dependent instrument correction factor to compensate for the polarization bias of the detection  
 113 system. The magnitude was obtained by a long tail matching technique<sup>5</sup>.

114 The decay of anisotropy ( $r(t)$ ) has been modelled by a bi-exponential decay function

$$117 \quad r(t) = r_0 \left( \beta_1 \exp\left(-\frac{t}{\varphi_1}\right) + \beta_2 \exp\left(-\frac{t}{\varphi_2}\right) \right) + k \quad (7)$$

118 where  $r_0$  is the initial anisotropy,  $\varphi_1$  and  $\varphi_2$  are the faster and slower rotational relaxation times,  
 119 respectively, with  $\beta_1$  and  $\beta_2$  being their corresponding amplitudes, and  $k$  is a constant.

120 When the bi-exponential decay function is recast according to the ‘Wobbling-in-a-cone’ model

121 
$$r(t) = r_0((1 - S^2)\exp\left(-\frac{t}{\varphi_1}\right) + S^2\exp\left(-\frac{t}{\varphi_2}\right)) \quad (8)$$

122 the order parameter ‘S’ recovered from the anisotropy decay data (*where*  $S^2 = \beta_2$ ) can provide information  
123 on local environment of the probe particularly in micelles [ENREF 5](#)<sup>6</sup>. In the wobbling-in-cone model, the  
124 semi-cone angle  $\theta_c$  is obtained from the relation <sup>6</sup>.

125 
$$\theta_c = \cos^{-1} \left[ \frac{1}{2} \left\{ (1 + 8|S|)^{\frac{1}{2}} - 1 \right\} \right] \quad (9)$$

126  
127  
128  
129  
130  
131  
132  
133  
134  
135  
136  
137  
138  
139  
140  
141  
142  
143  
144  
145  
146  
147  
148

149

150

151

152

153

154

155

## Supplementary Figures

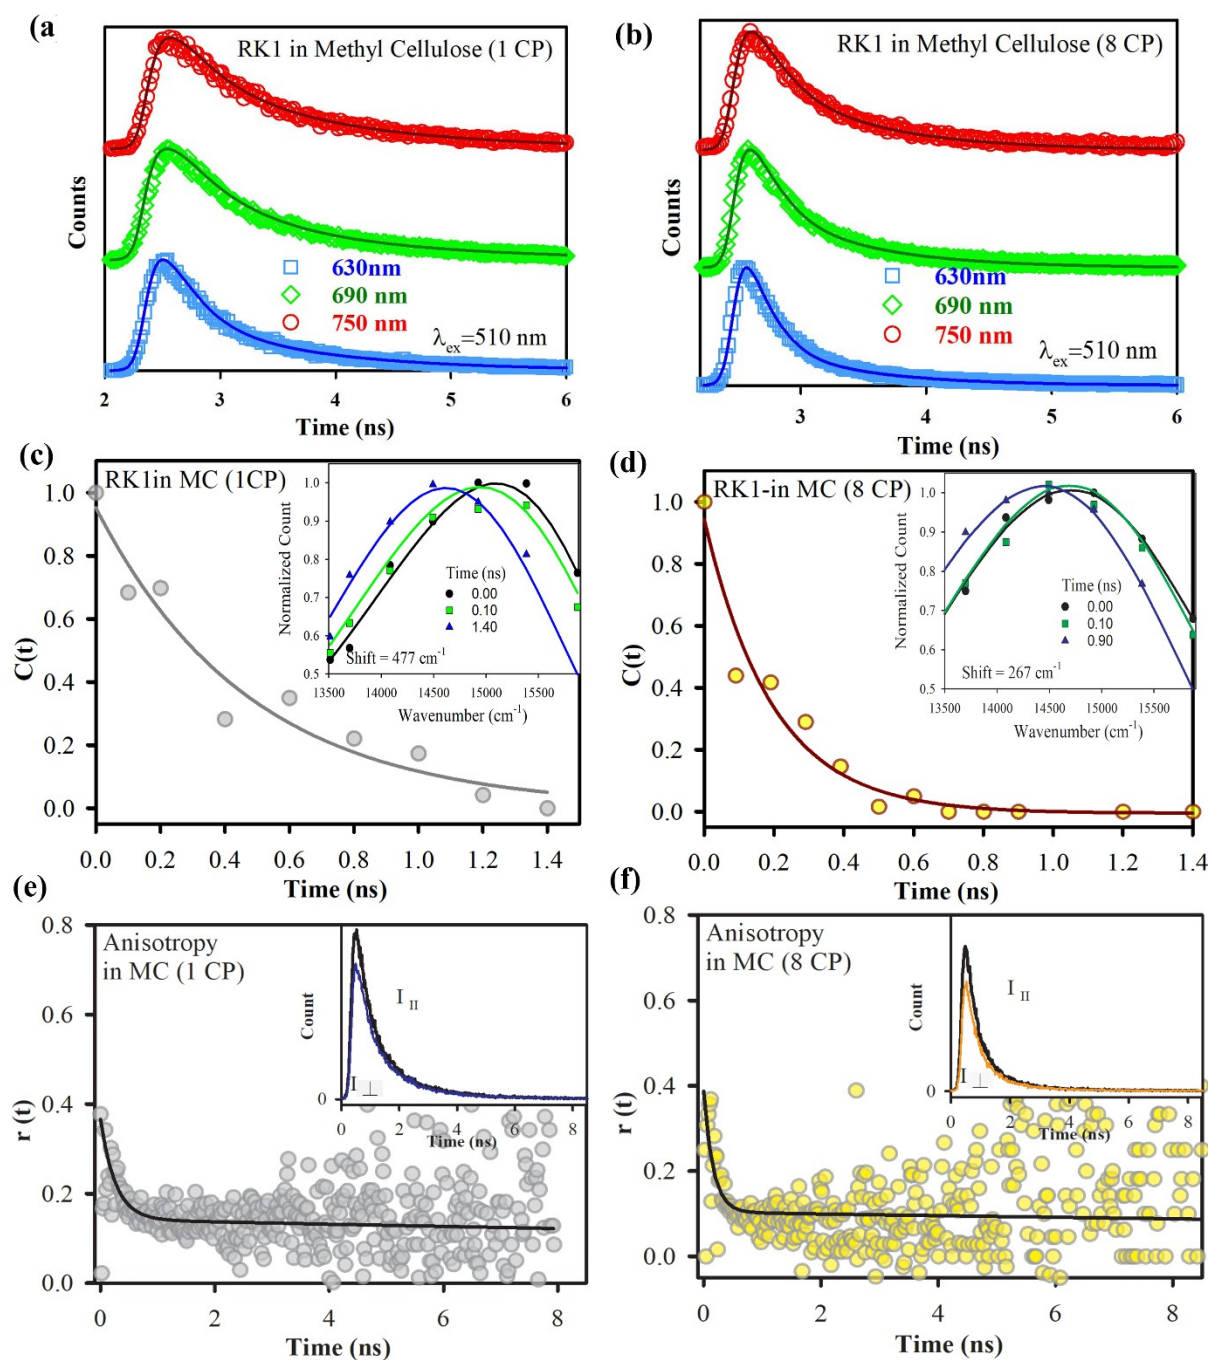

156

157 **Figure S1:** (a, b) represents the picosecond-resolved fluorescence decay transients of RK1 in methylcellulose at  
 158 the two different viscosities (1 CP and 8 CP), recorded at blue (630 nm), green (690 nm), and red (750 nm). (c,  
 159 d) The time evolution of the  $c(t)$  of RK1 up to several nanoseconds in methylcellulose 1 CP, and 8 CP  
 160 viscosities, TRES (inset) at three delay times, from the initial time 0, and at longer times 3 obtained from  
 161 TCSPC. (e, f) The corresponding time-resolved nanosecond anisotropy  $r(t)$ , the parallel and perpendicular  
 162 decay profile, is given in the inset of each part.

163

164

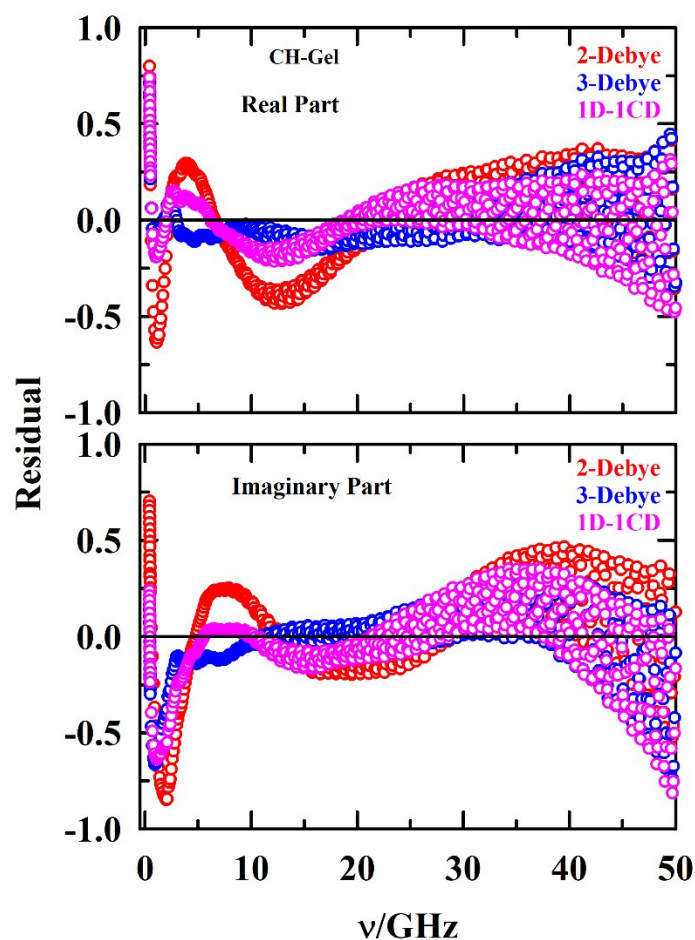

165

166 **Figure S2.** Residual comparison among 1-Debye, 2-Debye and 1D-1CD fits to the measured DR spectra for  
 167 chitosan hydrogel at 298 K. The representations are color-coded.

168

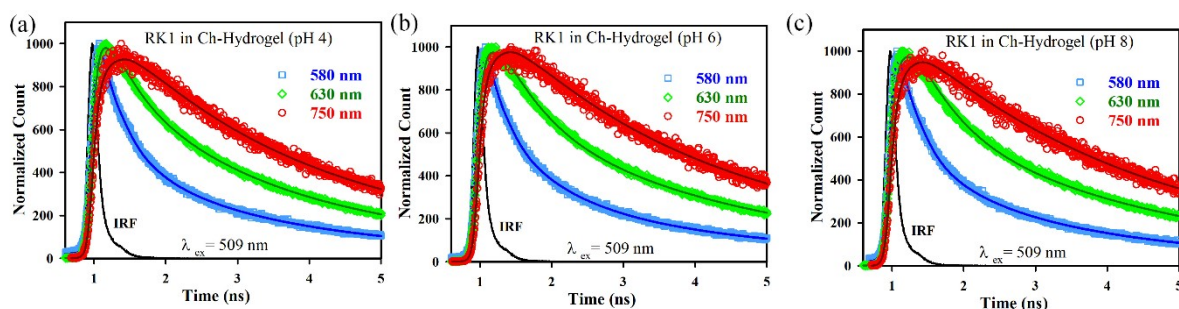

169

170 **Figure S3:** Represents the picosecond resolved fluorescence decay transients of RK1 in ch-hydrogel at the three  
 171 different pH levels (4, 6, 8), recorded at blue (580 nm), green (630 nm), and red (750 nm).

172

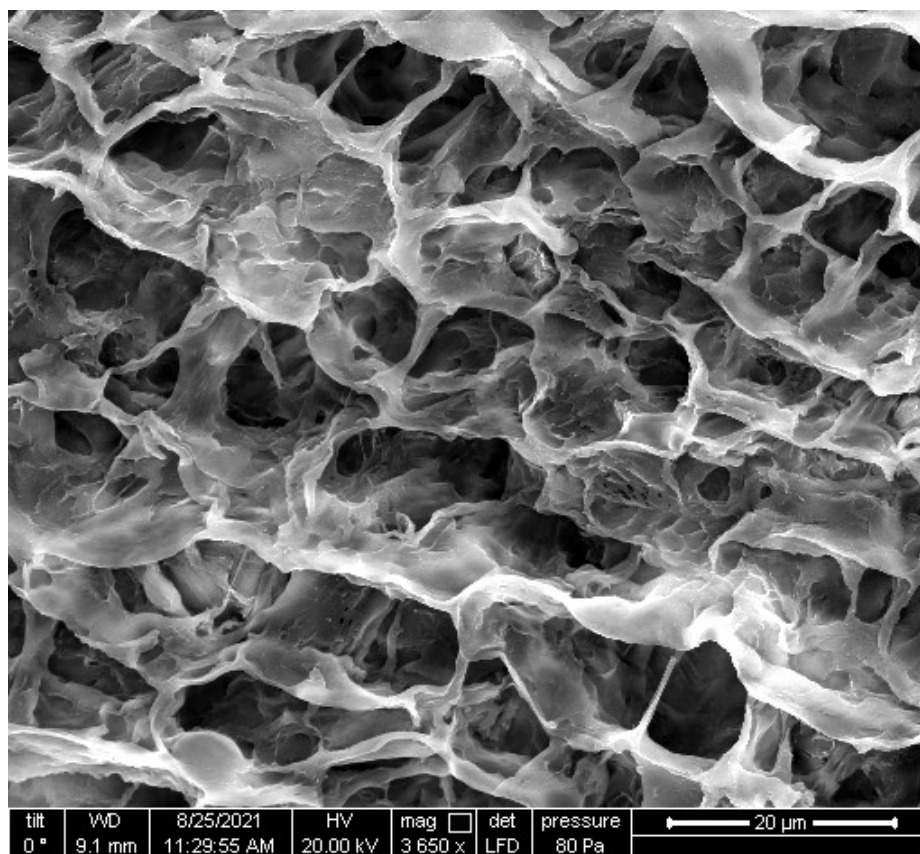

173

174 **Figure S4:** SEM image of the cross-sectional morphology of the chitosan hydrogel after lyophilization

175

176

177

178

179

180

181

182

183

184 **Table S1:** Decay Parameters obtained by fitting up to several nanoseconds:  $\tau_1$ , represents rise,  
185 whereas  $\tau_2$ , and  $\tau_3$  represents decay, their contribution is depicted in the parenthesis

| System                                  | Wavelength (nm) | $\tau_1$ (ps) (%)<br>rise | $\tau_2$ (ps) (%)<br>decay | $\tau_{avg}$ (ps)<br>decay |
|-----------------------------------------|-----------------|---------------------------|----------------------------|----------------------------|
| RK1 in Methyl Cellulose-Hydrogel (1 CP) | 630             | 250<br>(71%)              | 1160<br>(29%)              | 510                        |
|                                         | 690             | 400<br>(66 %)             | 1330<br>(33%)              | 710                        |
|                                         | 750             | 407<br>(65 %)             | 1400<br>(34%)              | 780                        |
| RK1 in Methyl Cellulose-Hydrogel (8 CP) | 630             | 130<br>(84%)              | 770<br>(36%)               | 230                        |
|                                         | 690             | 160<br>(72 %)             | 770<br>(27%)               | 329                        |
|                                         | 750             | 180<br>(62 %)             | 790<br>(38%)               | 408                        |

186

187 **Table S2. Decay characteristics of the solvent response function  $C(t)$  constructed from TCSPC**  
 188 **measurements, of RK1 in Methyl Cellulose at two different concentrations:**

| System | $\Delta\nu$ (cm <sup>-1</sup> ) | $\tau_1$ (ps) (a <sub>1</sub> %) |
|--------|---------------------------------|----------------------------------|
| 1 CP   | 477 cm <sup>-1</sup>            | 470                              |
| 8 CP   | 267 cm <sup>-1</sup>            | 190                              |

189

190 **Table S3: Time-resolved anisotropy  $r(t)$  parameters of methyl cellulose at different viscosities:**

| System | $\tau_1$ (ps) | $\tau_2$ (ns)  |
|--------|---------------|----------------|
| 1 CP   | 260<br>(61 %) | 50.0<br>(39 %) |

|      |               |                |
|------|---------------|----------------|
| 8 CP | 160<br>(73 %) | 50.0<br>(27 %) |
|------|---------------|----------------|

191

192 **Table S4. Decay Parameters of RK1 in chitosan hydrogel obtained by fitting up to several**  
 193 **nanoseconds:  $\tau_1$ , represents the rise, whereas  $\tau_2$ , and  $\tau_3$  represent decay; their contribution is**  
 194 **depicted in the parenthesis**

| System | Wavelength (nm) | $\tau_1$ (ps) (%)<br>(rise) | $\tau_2$ (ps) (%)<br>(decay) | $\tau_3$ (ps) (%)<br>(decay) | $\tau_4$ (ps) (%)<br>(decay) |
|--------|-----------------|-----------------------------|------------------------------|------------------------------|------------------------------|
| pH 4   | 580             |                             | 150<br>(57 %)                | 750<br>(23 %)                | 3000<br>(20 %)               |
|        | 630             |                             | 450<br>(30 %)                | 1400<br>(34 %)               | 3800<br>(35 %)               |
|        | 750             | 450<br>(14 %)               |                              | 650<br>(20 %)                | 3800<br>(66 %)               |
| pH 6   | 580             |                             | 150<br>(58%)                 | 850<br>(23 %)                | 3500<br>(19 %)               |
|        | 630             |                             |                              | 600<br>(45 %)                | 3500<br>(55 %)               |
|        | 750             | 400<br>(15 %)               |                              | 1300<br>(18 %)               | 4800<br>(67 %)               |
| pH 8   | 580             |                             | 150<br>(54 %)                | 930<br>(21 %)                | 3500<br>(24 %)               |
|        | 630             |                             |                              | 700<br>(33 %)                | 3500<br>(66 %)               |

|  |     |              |  |                |               |
|--|-----|--------------|--|----------------|---------------|
|  | 750 | 800<br>(6 %) |  | 2300<br>(53 %) | 5000<br>(4 %) |
|--|-----|--------------|--|----------------|---------------|

195

196

197

198

199

200

201

202

203

204

205

206

207

208

209

210

211

212 **References:**

- 213 1. F. Kremer and A. Schönhal, *Broadband dielectric spectroscopy*, Springer Science & Business Media, 2002.
- 214 2. J. R. Lakowicz, *Principles of fluorescence spectroscopy*, Springer, 2006.
- 215 3. M. Horng, J. Gardecki, A. Papazyan and M. Maroncelli, *The Journal of Physical Chemistry*, 1995, **99**, 17311-
- 216 17337.

## ARTICLE

## Journal Name

- 217 4. M. Das, S. Mondal, R. Ghosh, S. Darbar, L. Roy, A. K. Das, D. Pal, S. S. Bhattacharya, A. K. Mallick and J. K.  
218 Kundu, *Journal of Biomedical Materials Research Part A*, 2024.
- 219 5. G. F. Schröder, U. Alexiev and H. Grubmüller, *Biophysical journal*, 2005, **89**, 3757-3770.
- 220 6. K. Kinoshita, A. Ikegami and S. Kawato, *Biophysical journal*, 1982, **37**, 461-464.

221

222

223

224

225

226

227

228

229

230

231

232

233

234

235

236

237

238

239

Journal Name

ARTICLE

240

241

242

243

244

245

246

247

248

249

250

251
